# Supplementary material
Source: Royal Society of Chemistry journal article supplement (doi:10.1039/d6ta00798h)
Supplement: d6ta00798h1.pdf [file d6ta00798h1.pdf]

---

## Supporting Information

### **Enhancing electrocatalytic nitrogen reduction on Ce-WO<sub>3</sub> catalysts through atomically local electric field effect: accelerated electron transfer and enhanced nitrogen activation**

Hao Che<sup>a</sup>, Xiaoxuan Wang<sup>\*a</sup>, Jingwen Guo<sup>a</sup>, Yibo Wang<sup>a</sup>, Qi Luo<sup>a</sup>, Minglei Wang<sup>a</sup>, Jun Xiang<sup>a</sup>, Zheng Zhen,<sup>b</sup> Rongda Zhao<sup>\* a</sup>, Fufa Wu<sup>\* C</sup>

<sup>a</sup> *School of Materials Science and Engineering,*

*Liaoning University of Technology*

*Jinzhou, Liaoning Province, 121001, People's Republic of China*

<sup>b</sup> *Center for Analysis and Measurement,*

*Harbin Institute of Technology,*

*Harbin 150001, People's Republic of China*

<sup>c</sup> *School of Materials Science and Engineering,*

*Liaoning Technical University*

*Fuxin, Liaoning Province, 123032, People's Republic of China*

\* Corresponding Authors.

*E-mail address:* [clwangxx@lnut.edu.cn](mailto:clwangxx@lnut.edu.cn); [rongdazhaoln@126.com](mailto:rongdazhaoln@126.com); [ffwu@lnut.edu.cn](mailto:ffwu@lnut.edu.cn)

---

## Experimental Procedures

### Chemicals and Materials

Commercial Tungsten Hexachloride ( $\text{WCl}_6$ ) and Cerium Trichloride ( $\text{CeCl}_3$ ) were obtained from Shanghai Chemical Reagent Co. Ltd. Hydrazine hydrate ( $\text{N}_2\text{H}_4 \cdot \text{H}_2\text{O}$ ) and ethanol ( $\text{C}_2\text{H}_5\text{OH}$ ) were procured from Sigma-Aldrich chemical company. Salicylic acid ( $\text{C}_7\text{H}_6\text{O}_3$ ,  $\geq 99.7\%$ ), ammonium chloride ( $\text{NH}_4\text{Cl}$ , 99.998%), p-dimethylaminobenzaldehyde ( $p\text{-C}_9\text{H}_{11}\text{NO}$ , 99%), trisodium sodium citrate dehydrate ( $\text{C}_6\text{H}_5\text{Na}_3\text{O}_7 \cdot 2\text{H}_2\text{O}$ , 99%), sodium nitroferricyanide dihydrate ( $\text{C}_3\text{FeN}_6\text{Na}_2\text{O} \cdot 2\text{H}_2\text{O}$ , 99%), and sodium hypochlorite solution ( $\text{NaClO}$ , available chlorine 6-10%) were obtained from Beijing Chemical Corp. Nafion solution (5 wt%) was purchased from Sigma-Aldrich Chemical Reagent Co., Ltd. All chemicals were used without any further purification. Ultrapure Smart-S15 water (18.2 M $\Omega$ ) was used in all experiments.

### Characterizations

To observe the morphology and microstructure of the samples, field emission scanning electron microscopy (SEM, FEI Quanta 200), transmission electron microscopy (TEM, FEI Tecnai G2 20), and high-resolution TEM (HRTEM, JEM-2100F, 200 kV) were employed. The crystalline structures were analyzed using X-ray diffraction (XRD, Rigaku D/max 2500) equipped with Cu K $\alpha$  radiation ( $\lambda = 0.15405$  nm). The surface chemical status and composition were analyzed using X-ray photoelectron spectroscopy (XPS, Thermo Fisher Scientific) with an Al K $\alpha$  X-ray source and FINDER Vista Laser micro-Raman Spectroscopy (Zolix, China) with laser excitation of 532 nm. The Kelvin probe force microscopy (KPFM) was obtained to analyze the surface potential of the materials using atomic force microscopy (AFM, Oxford MFP-3D, UK). For *in situ* Raman tests using an excitation wavelength of 532 nm, the electrochemical operando flow cell (EC-RAIR-H) was provided by Tianjin Gauss Union technology Co. Ltd. A SOPTOP LMPlan objective (50X) was used for signal collection and the collection time was 30 seconds. Laser power was kept below 1.5 mW to protect the sample from laser damage.

### Synthesis of electrocatalysts

0.405 g of  $\text{WCl}_6$  was added to a beaker containing 60 mL of ethanol and subjected to ultrasonic dispersion for 10 minutes. Subsequently, 0.015 (0.01 and 0.02) g of  $\text{CeCl}_3$  was dissolved in 10 mL of ethanol and combined with the above suspension, and stirred for a further 20 minutes. The resulting mixture was then transferred to a Teflon-lined autoclave and heated at 200 °C for 10 hours. After the reaction, the mixture was centrifuged and washed three times with deionized water followed by ethanol. Finally, the product was dried under vacuum at 50 °C to obtain  $\text{Ce-WO}_3$  ( $\text{Ce}_1\text{-WO}_3$  and  $\text{Ce}_3\text{-WO}_3$ ). The  $\text{WO}_3$  was synthesized using the same procedure, but without the addition of  $\text{CeCl}_3$ .

### Electrochemical Measurements

The Nafion membrane was pretreated by boiling in  $\text{H}_2\text{O}_2$  solution (3 wt%), 0.5 M  $\text{H}_2\text{SO}_4$ , and ultrapure water at 80 °C for 1 h, respectively. Electrochemical measurements were carried out in a typical H-type electrolytic cell separated by Nafion 117 membrane. The prepared  $\text{Ce-WO}_3/\text{CP}$  electrode, platinum gauze electrode and  $\text{Ag}/\text{AgCl}$  electrode were used as the working electrode, counter electrode and reference electrode, respectively. The potentials reported in this work were converted to RHE scale via calibration with the following equation:  $E$  (vs RHE) =  $E$  (vs  $\text{Ag}/\text{AgCl}$ ) + 0.197 + 0.0591  $\times$  pH. Before the electrochemical  $\text{N}_2$  reduction measurements,  $\text{N}_2$  was continuously pumped into the 0.1 M  $\text{Li}_2\text{SO}_4$  electrolyte for 30 min. Electrochemical  $\text{N}_2$  reduction was performed in  $\text{N}_2$ -saturated 0.1 M  $\text{Li}_2\text{SO}_4$  electrolyte. The LSV curves were conducted at the scan rate of 10 mV  $\text{s}^{-1}$  under Ar- or  $\text{N}_2$ -saturated 0.1 M  $\text{Li}_2\text{SO}_4$  solution using the CHI 760e electrochemical workstation.

### Preparation of $\text{WO}_3$ and $\text{Ce-WO}_3$ electrode

$\text{Ce-WO}_3/\text{CP}$  ( $\text{Ce}_1\text{-WO}_3/\text{CP}$  and  $\text{Ce}_3\text{-WO}_3/\text{CP}$ ) electrodes were prepared as follows: First, 5 mg of  $\text{Ce-WO}_3$  ( $\text{Ce}_1\text{-WO}_3$  and  $\text{Ce}_3\text{-WO}_3$ ) catalyst and 20  $\mu\text{L}$  of Nafion solution (5 wt%) were dispersed in 980  $\mu\text{L}$  of a mixed solution containing ethanol and  $\text{H}_2\text{O}$  (V:V=2:1) by sonication for 30 minutes to form a homogeneous ink. Then, 20  $\mu\text{L}$  of the  $\text{Ce-WO}_3$  ink was loaded onto a carbon paper (1 cm  $\times$  1 cm) and dried.  $\text{WO}_3/\text{CP}$  were prepared using the same method.

### Determination of $\text{NH}_3$

Concentration of produced  $\text{NH}_3$  was determined by the indophenol blue method. In detail, 2 mL post-tested solution was removed from the cathodic chamber, and then added into 2 mL 1.0 M NaOH solution containing  $\text{C}_7\text{H}_6\text{O}_3$  and  $\text{C}_6\text{H}_5\text{Na}_3\text{O}_7 \cdot 2\text{H}_2\text{O}$  (5 wt%). Next, 1 mL NaClO (0.05 M) and 0.2 mL  $\text{Na}_2[\text{Fe}(\text{NO})(\text{CN})_5] \cdot 2\text{H}_2\text{O}$  (1 wt%) aqueous solutions were added sequentially. The mixture was allowed to stand at room temperature for 2 hours, after which the UV-Vis absorption spectrum was measured. Calibration of the concentration-absorbance curve was performed using standard  $\text{NH}_4\text{Cl}$  solutions with concentrations ranging from 0.1 to 1.2  $\mu\text{g mL}^{-1}$ , which were prepared by diluting a 100  $\mu\text{g mL}^{-1}$   $\text{NH}_4\text{Cl}$  solution with 0.1 M  $\text{Li}_2\text{SO}_4$ . The concentration of indophenol blue was determined by measuring the absorbance at a wavelength of 655 nm. A linear relationship between absorbance value and  $\text{NH}_4\text{Cl}$  concentration was observed with a fitting curve of  $y = 0.30284x + 0.0337$  ( $R^2 = 0.999$ ), which was obtained from three independent calibrations.

## **<sup>15</sup>N isotope labeling experiment**

<sup>15</sup>N<sub>2</sub> with a <sup>15</sup>N enrichment of 99% (from Aladdin) was used to carry out the isotopic labeling experiment in a 0.1 M Li<sub>2</sub>SO<sub>4</sub> electrolyte. The reactor was encapsulated, degassed, and injected with Ar for several times, and finally filled with <sup>15</sup>N<sub>2</sub>. After electrolysis at -0.5 V vs RHE for 2 h with the injection of 20 mL <sup>15</sup>N<sub>2</sub> every 10 min, 30 mL of the electrolyte was taken out and concentrated to 1 mL by heating at 75 °C. Then, 0.1 mL of the resultant solution was thoroughly mixed with 0.6 mL of the dimethyl sulphoxide-D6 (99.9% D, from Adamas) for the <sup>1</sup>H nuclear magnetic resonance (NMR) measurement on a Bruker Avance III HD 500 NMR spectrometer. For comparison, <sup>14</sup>N<sub>2</sub> experiment was also operated in the same method.

### **Determination of N<sub>2</sub>H<sub>4</sub>**

The hydrazine present in the electrolyte was estimated via the method of Watt and Chrisp. A mixture of p-C<sub>9</sub>H<sub>11</sub>NO (5.99 g), HCl (concentrated, 30 mL) and C<sub>2</sub>H<sub>5</sub>OH (300 mL) was used as a color reagent. In detail, 2 mL electrolyte was removed from the electrochemical reaction vessel and added into 2 mL above prepared color reagent and stirring 20 min at room temperature. The absorbance of the resulting solution was measured at 455 nm. The concentration absorbance curves were calibrated using standard N<sub>2</sub>H<sub>4</sub>·H<sub>2</sub>O solution with a series of concentrations. The fitting curve ( $y = 1.3741x + 0.0007$ ,  $R^2 = 0.9999$ ) shows a good linear relation of absorbance value with N<sub>2</sub>H<sub>4</sub> concentration.

### **Calculations of NH<sub>3</sub> formation rate and Faradaic efficiency (FE)**

The NH<sub>3</sub> yield rate was calculated using the following equation:

$$V(\mu\text{g h}^{-1}\text{mg}_{\text{cat}}^{-1}) = \frac{C_{\text{NH}_3} \times V}{t \times m_{\text{cat}}}$$

The FE was calculated according to the following equation:

$$\text{FE} = \frac{3 \times F \times C_{\text{NH}_3} \times V}{17 \times Q}$$

where  $C_{\text{NH}_3}$  ( $\mu\text{g mL}^{-1}$ ) is the measured concentration of NH<sub>3</sub>; V (mL) is the volume of electrolyte (30 mL); t (s) is the reduction reaction time;  $m_{\text{cat}}$  (mg) is the mass loading of catalyst on CP; F is Faraday constant (96500 C mol<sup>-1</sup>); Q (C) is the quantity of applied charge/electricity.

### **In-situ Raman spectroscopy measurements**

In-situ Raman spectroscopy measurements were conducted on the Witec Alpha 300R Raman system, and data was collected at 5 seconds of exposure time averaged over 20 scans. Potentiation tests were performed at -0.5 V vs. RHE in a customized Teflon cell with a quartz window, and the electrolyte was flowed by the peristaltic pump. The self-supported material as the working electrode was immersed in the electrolyte, and the electrode plane was kept perpendicular to the laser. The Raman spectroscopy was recorded.

### **In-situ ATR-FTIR measurements**

In-situ ATR-FTIR was performed on the Thermo Scientific Nicolet iS50 spectrometer equipped with a liquid N<sub>2</sub>-cooled MCT-A detector. The self-supported material as the working electrode was pressed against the silicon crystal covered by a gold film, forming a thin electrolyte layer between the working electrode and the silicon crystal. Potentiation tests were performed at -0.5 V vs. RHE in a customized Teflon cell, and the electrolyte was flowed by the peristaltic pump. Background spectrum was taken at the open circuit potential. FTIR spectra were recorded.

### **In situ XAS experiments**

The in situ XAFS measurements of the W L<sub>3</sub>-edge spectra were carried out at 1W1B station in Rapid XAFS. A customized Spectro Electrochemical Cell for in situ XAFS experiments was used, which consisted of a transparent PMMA flat wall and a circular hole (1.5 cm in diameter). The prepared CP with Ce-WO<sub>3</sub> (2×2 cm<sup>2</sup>) were wrapped with the waterproof tape to cover the X-ray beam. In the cell, an Ag/AgCl reference electrode and a platinum foil as counter electrode were used. Ce-WO<sub>3</sub> with conductive copper foil as the working electrode and 0.1 M Li<sub>2</sub>SO<sub>4</sub> solution was used as electrolyte. The data reduction, analysis and EXAFS fitting were performed using the Athena and Artemis programs from the Demeter data analysis package. The FEFF6 program was used for EXAFS data fitting. Energy calibration was performed utilizing a standard W foil, which was measured as a reference. A linear function was subtracted from the pre-edge region, followed by normalization of the edge jump using Athena software. The k<sup>2</sup>-weighted  $\chi(k)$  data were Fourier transformed after the application of a Hanning window function ( $\Delta k=1.0$ ). For EXAFS modeling, global amplitude parameters (CN, R,  $\sigma^2$ , and  $\Delta E_0$ ) were derived through nonlinear least-squares refinement of the EXAFS equation applied to the Fourier-transformed data in R-space, utilizing Artemis software. The wavelet transform data were generated by inputting relevant parameters into the HAMA software.

---

## Computational Details

Spin-polarized density functional theory (DFT) simulations were performed to calculate the adsorption of N<sub>2</sub> molecule using the Vienna ab initio simulation package (VASP). The Perdew-Burke-Ernzerhof (PBE) functional within the framework of generalized gradient approximation (GGA) was applied to describe the exchange-correlation interactions. DFT-D2 method was adopted to consider the van der Waals (vdW) interaction. For structural optimization, the Brillouin zone was sampled by 4×3×1 k-points for plane-wave basis, together with an energy cutoff of 500 eV. The WO<sub>3</sub> (010) facet has been cleaved with a vacuum layer of 20 Å to build the WO<sub>3</sub> and Ce-WO<sub>3</sub> slab models. All the atoms were allowed to relax until the residue forces on each atom were less than 0.02 eV/Å. The convergence criterions were set to 10<sup>-5</sup> eV for total energy. Specially, the value of U in Ce 4f and W 5d is 6 and 6.2, respectively, which is applied to each calculation. In order to avoid interactions between periodic images, a vacuum space of 20 Å was applied to all calculations. The formation Gibbs free energy ( $\Delta G$ ) of the NRR intermediates is calculated as:

$$\Delta G = \Delta E + \Delta ZPE - T\Delta S$$

where  $\Delta E$  is the electronic energy difference directly obtained from DFT calculations,  $\Delta ZPE$  is the change of zero-point energies, T is the temperature (T=298.15 K), and  $\Delta S$  is the entropy changes. The entropy of gas molecules is taken from standard values.

## MATLAB Simulation Methods

Simulation study of electric field was conducted using MATLAB.

The intensity of electric field can be expressed as

$$U_p = \sum_{i=1}^n \frac{Q_i}{r_i}$$

$k = 9 \times 10^9 \text{ N m}^2 / \text{C}^2$  (electrostatic force constant)

$e = -1.6 \times 10^{-19} \text{ C}$  (electric charge)

$\text{\AA} = 10 \times 10^{-10} \text{ m}$

Where  $U_p$ ,  $Q_i$  and  $r_i$  are the intensity of the electric field, the charge on atoms, and the relative location of atoms, respectively.

## Results and Discussion

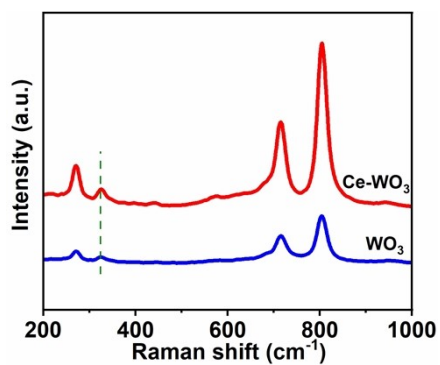

Fig. S1 Raman spectra of  $\text{WO}_3$  and  $\text{Ce-WO}_3$ .

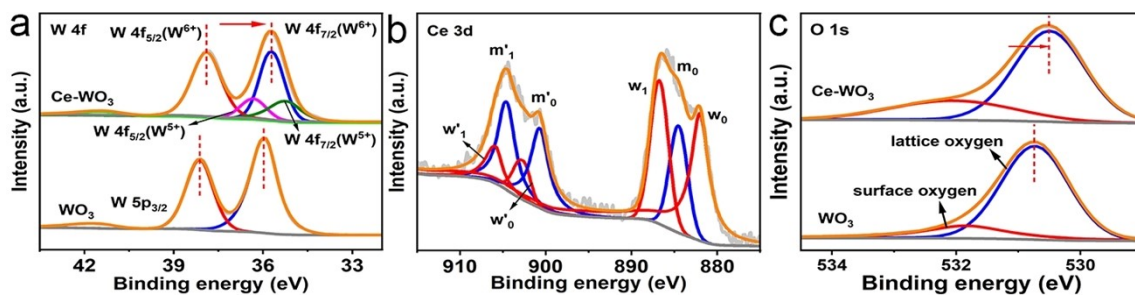

Fig. S2 (a) W 4f XPS spectra of  $\text{WO}_3$  and  $\text{Ce-WO}_3$ . (b) XPS spectra of Ce 3d for  $\text{Ce-WO}_3$ . (c) XPS spectra of O 1s for  $\text{WO}_3$  and  $\text{Ce-WO}_3$ .

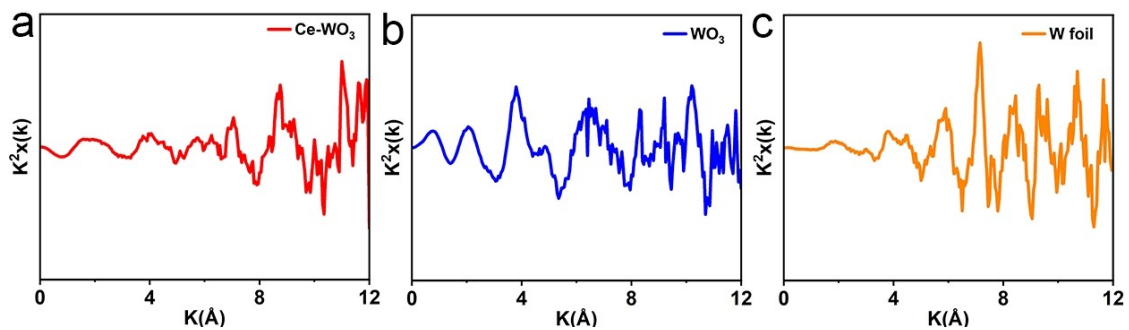

Fig. S3 W  $L_3$ -edge EXAFS oscillation spectra of (a)  $\text{Ce-WO}_3$ , (b)  $\text{WO}_3$  and (c) W foil.

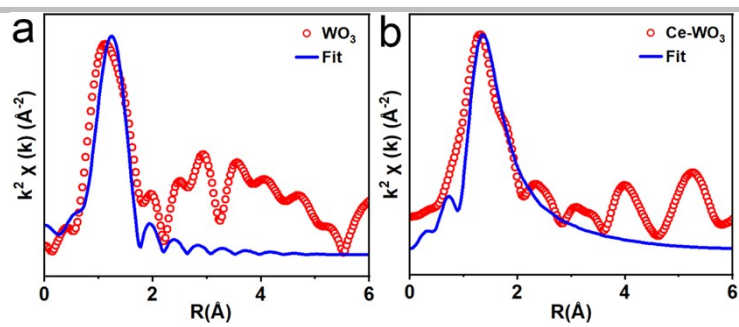

Fig. S4 (a-b) EXAFS of R-space fitting curve of W for  $\text{WO}_3$  and  $\text{Ce-WO}_3$ .

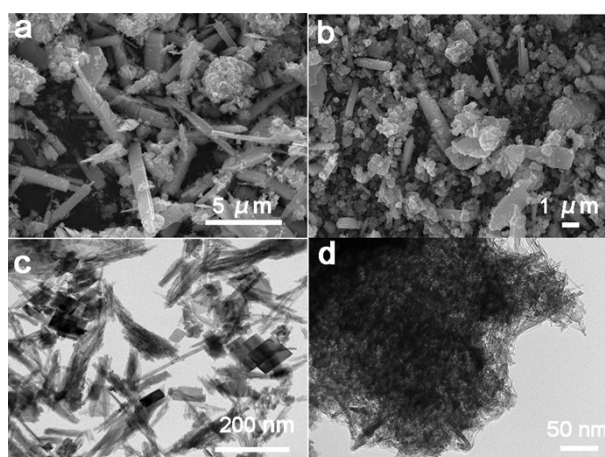

Fig. S5 (a) SEM images of  $\text{WO}_3$ . (b) SEM images of  $\text{Ce-WO}_3$ . (c) TEM images of  $\text{WO}_3$ . (d) TEM images of  $\text{Ce-WO}_3$ .

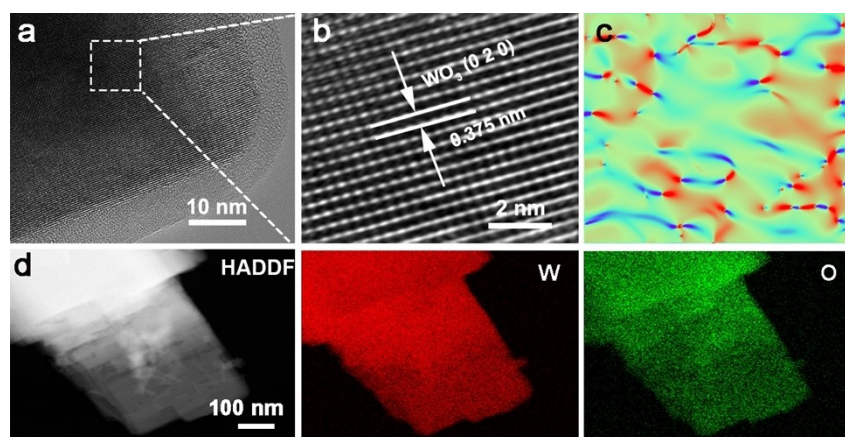

Fig. S6 (a) HR-TEM of  $\text{WO}_3$ . (b) IFFT of  $\text{WO}_3$ . (c) Strain images of  $\text{WO}_3$ . (d) EDS mappings of  $\text{WO}_3$  showing the homogeneous distribution of W (red) and O (green).

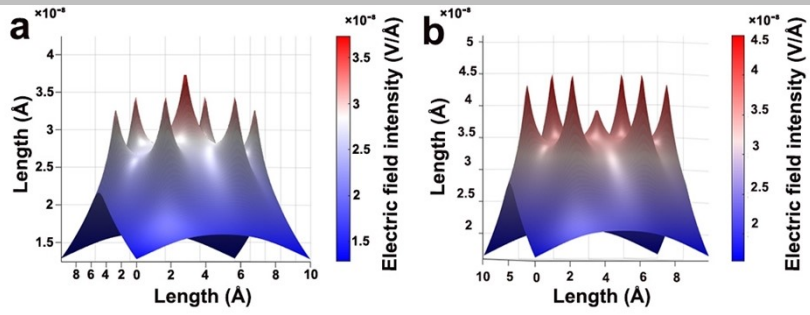

Fig. S7 (a-b) MATLAB simulation of local electric field on  $\text{WO}_3$  and  $\text{Ce-WO}_3$ .

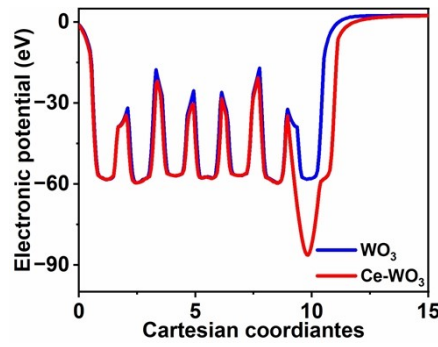

Fig. S8 ESP curves of  $\text{WO}_3$  and  $\text{Ce-WO}_3$ .

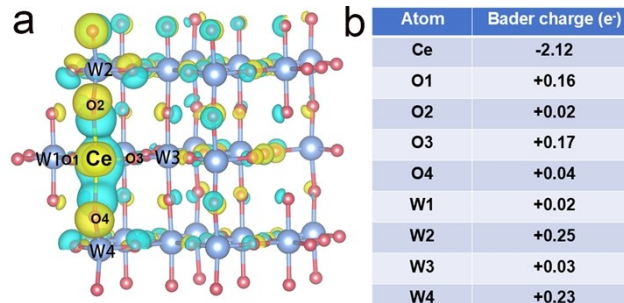

Fig. S9 (a) Charge density difference of  $\text{Ce-WO}_3$ . (b) Bader charge in  $\text{Ce-O-W}$  unit sites.

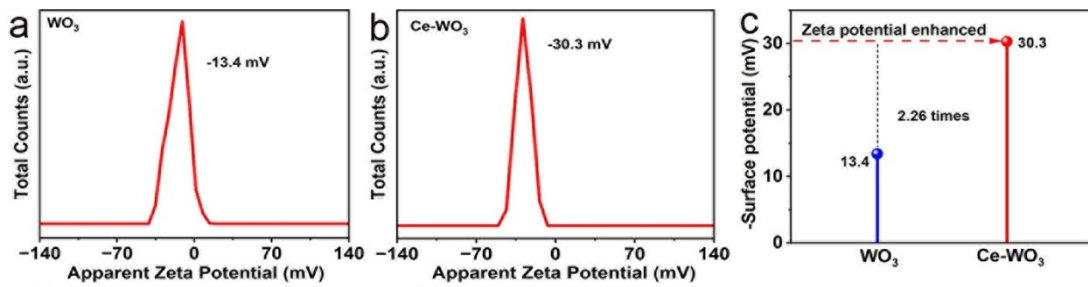

Fig. S10 Zeta potential of (a)  $\text{WO}_3$  and (b)  $\text{Ce-WO}_3$ . (c) The Zeta potential of  $\text{WO}_3$  and  $\text{Ce-WO}_3$  samples.

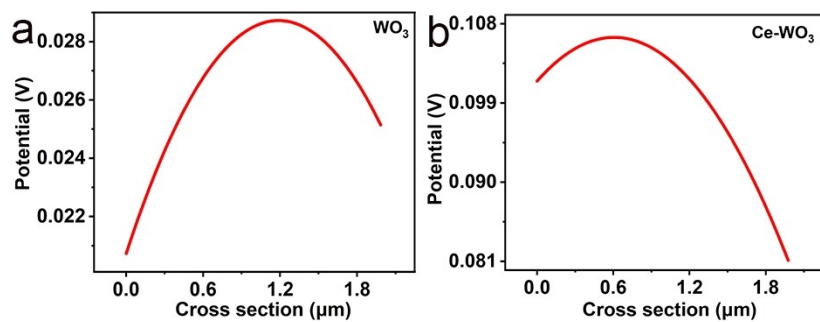

Fig. S11 The potential distributions of (a)  $\text{WO}_3$  and (b)  $\text{Ce-WO}_3$ .

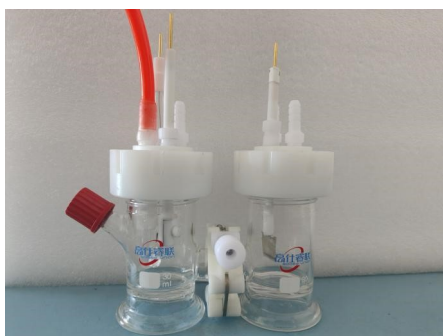

Fig. S12 The home-made reactor for ENRR.

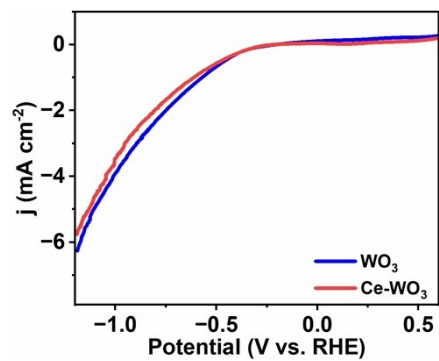

Fig. S13 LSV curves of  $\text{WO}_3$  and  $\text{Ce-WO}_3$  for the HER.

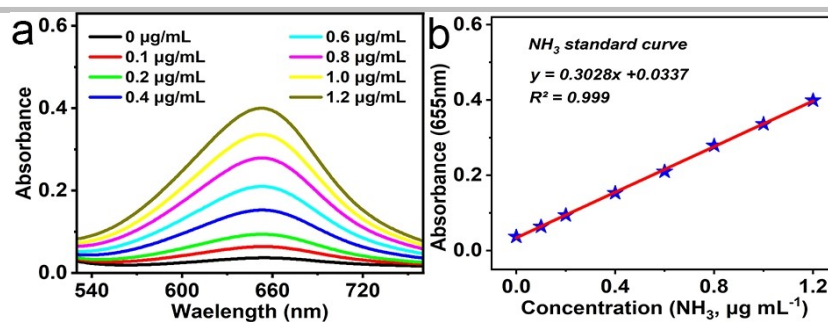

Fig. S14 (a) UV-vis absorption spectra of various  $\text{NH}_4^+$  concentrations after incubated for 2h at room temperature. (b) Calibration curve used for calculating  $\text{NH}_4^+$  concentrations.

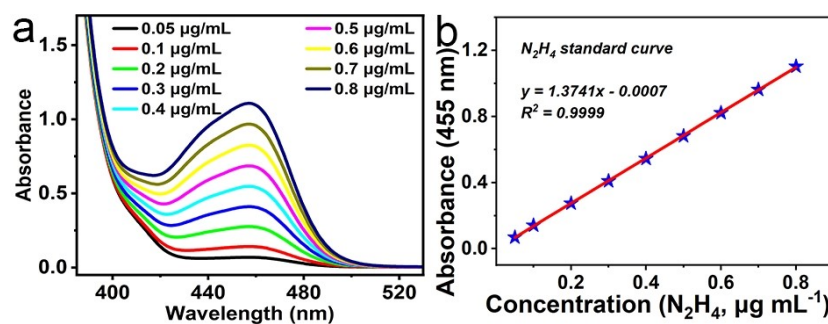

Fig. S15 (a) UV-vis absorption spectra of various  $\text{N}_2\text{H}_4$  concentrations after incubated for 20 min at room temperature. (b) Calibration curve used for calculating  $\text{N}_2\text{H}_4$  concentrations.

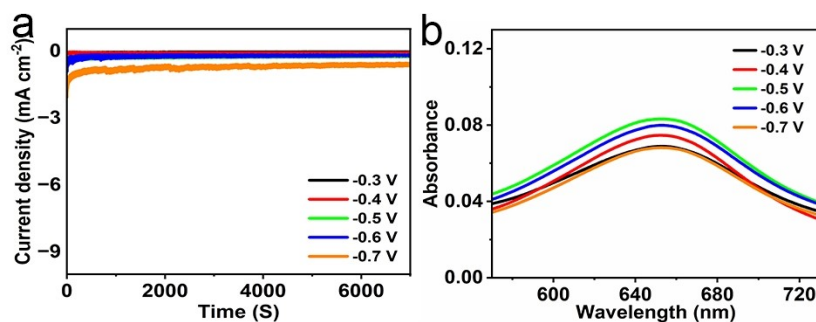

Fig. S16 (a) Chronoamperometry curves of  $\text{WO}_3$  at different potentials in  $\text{N}_2$ -saturated 0.1 M  $\text{Li}_2\text{SO}_4$ . (b) UV-Vis absorption spectra of  $\text{WO}_3$ .

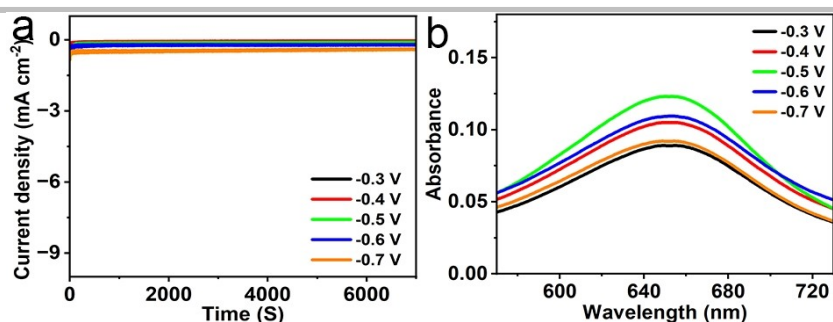

Fig. S17 (a) Chronoamperometry curves of Ce-WO<sub>3</sub> at different potentials in N<sub>2</sub>-saturated 0.1 M Li<sub>2</sub>SO<sub>4</sub>. (b) UV-Vis absorption spectra of Ce-WO<sub>3</sub>.

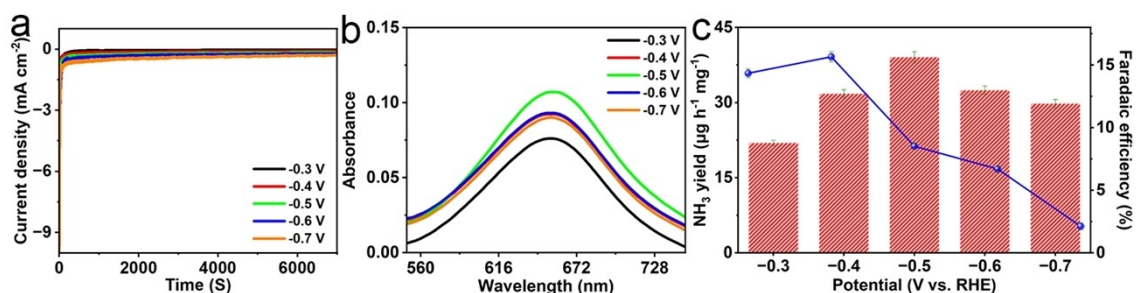

Fig. S18 (a) Chronoamperometry curves of Ce<sub>1</sub>-WO<sub>3</sub> at different potentials in N<sub>2</sub>-saturated 0.1 M Li<sub>2</sub>SO<sub>4</sub>. (b) UV-Vis absorption spectra of Ce<sub>1</sub>-WO<sub>3</sub>. (c) NH<sub>3</sub> yields and FEs of Ce<sub>1</sub>-WO<sub>3</sub>.

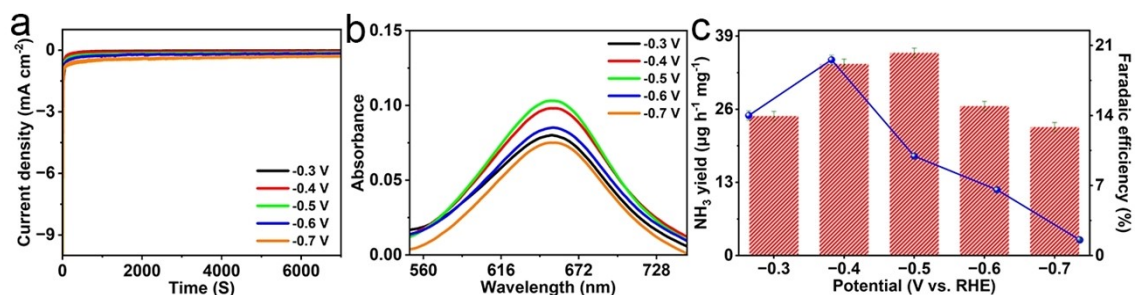

Fig. S19 (a) Chronoamperometry curves of Ce<sub>3</sub>-WO<sub>3</sub> at different potentials in N<sub>2</sub>-saturated 0.1 M Li<sub>2</sub>SO<sub>4</sub>. (b) UV-Vis absorption spectra of Ce<sub>3</sub>-WO<sub>3</sub>. (c) NH<sub>3</sub> yields and FEs of Ce<sub>3</sub>-WO<sub>3</sub>.

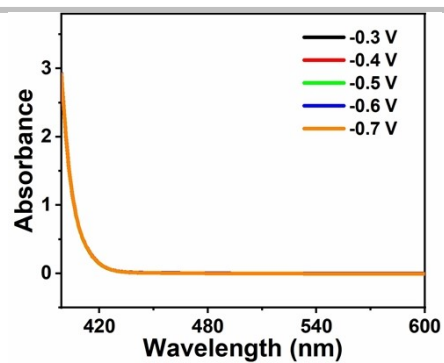

Fig. S20 UV-vis absorption spectra of the hydrazine.

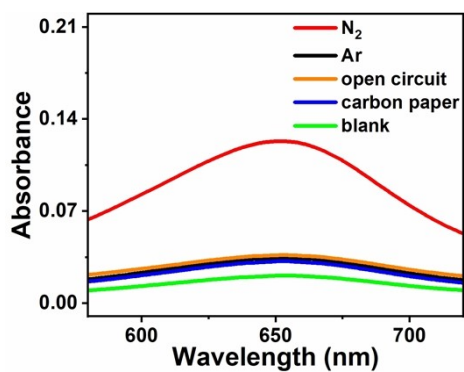

Fig. S21 UV-vis absorption spectra under different control experiments.

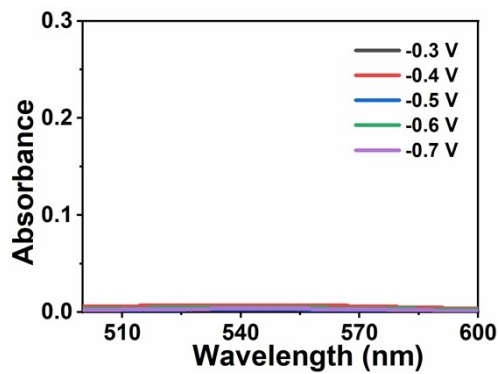

Fig. S22 The UV-vis absorbance spectra of NO<sub>2</sub><sup>-</sup>.

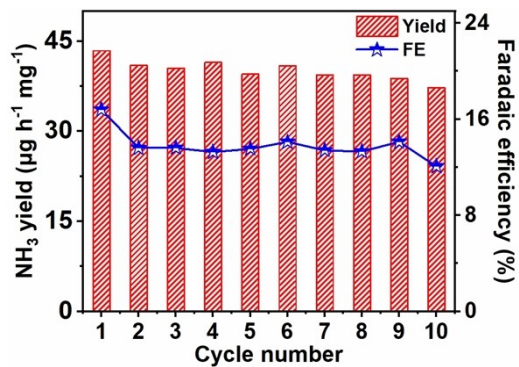

Fig. S23 Cycling test for Ce-WO<sub>3</sub> at -0.5 V vs RHE.

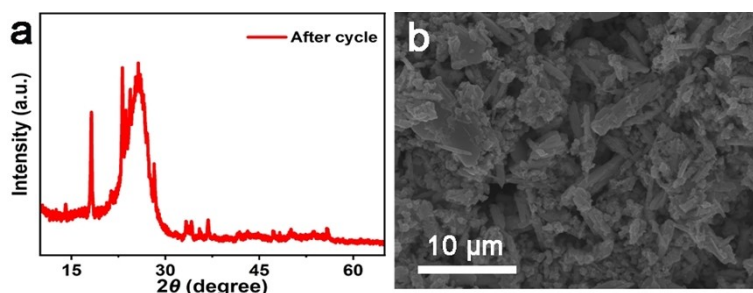

Fig. S24 (a) XRD and (b) SEM image of Ce-WO<sub>3</sub> after stability test.

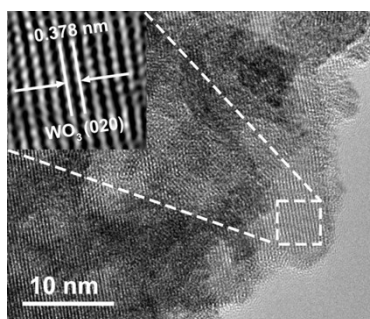

Fig. S25 TEM image of Ce-WO<sub>3</sub> after stability test.

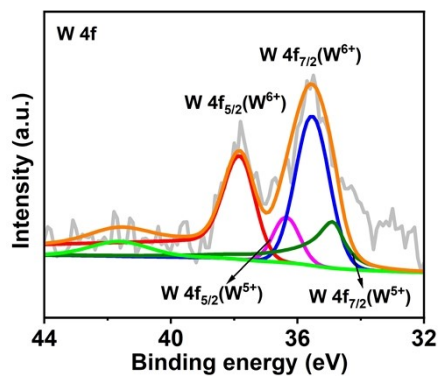

Fig. S26 W 4f XPS spectra of Ce-WO<sub>3</sub> after stability test.

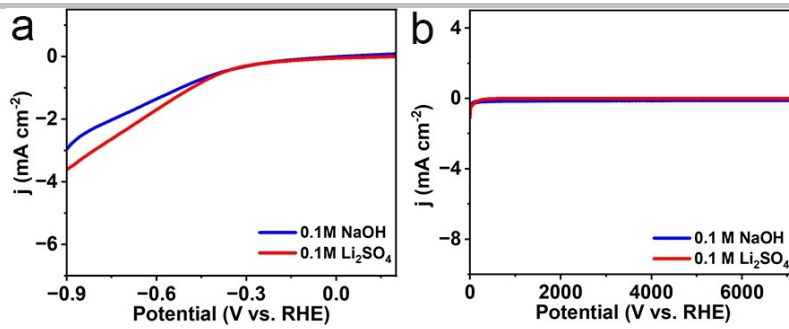

Fig. S27 (a) LSV curves of Ce-WO<sub>3</sub> and (b) chronoamperometry curves of Ce-WO<sub>3</sub> in the 0.1 M Li<sub>2</sub>SO<sub>4</sub> and 0.1 M NaOH at -0.5 V vs RHE.

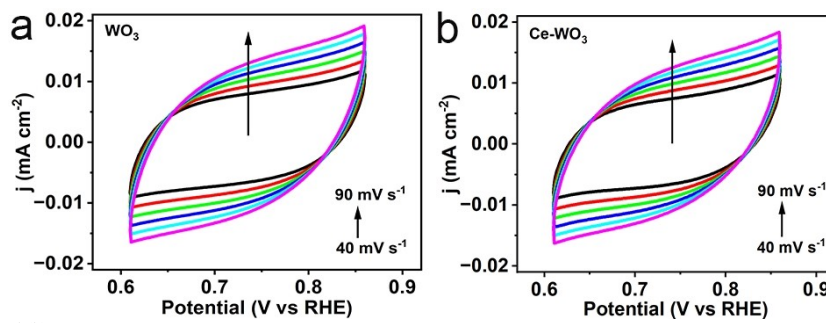

Fig. S28 CV curves of (a) WO<sub>3</sub> and (b) Ce-WO<sub>3</sub>.

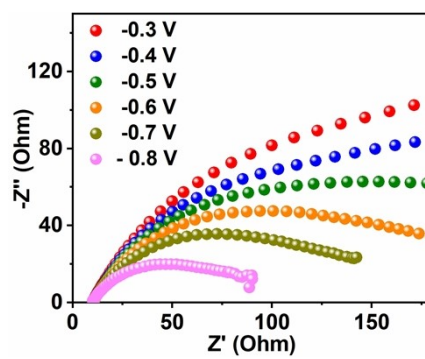

Fig. S29 Nyquist plots of WO<sub>3</sub>.

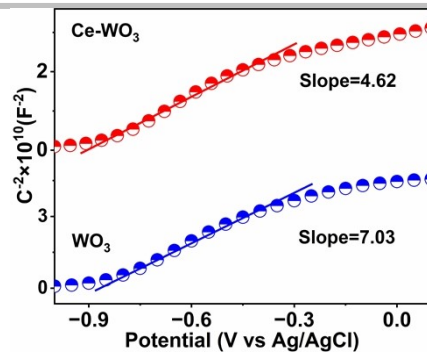

Fig. S30 Mott-Schottky plots of  $\text{WO}_3$  and  $\text{Ce-WO}_3$ .

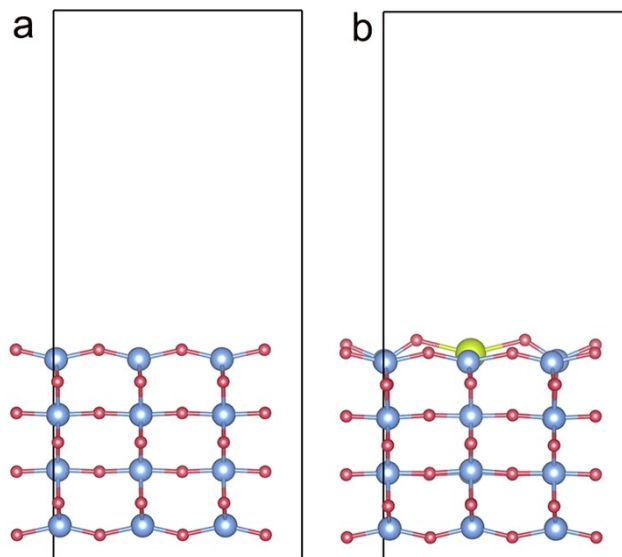

Fig. S31 The side view of optimized structure for (a)  $\text{WO}_3$  and (b)  $\text{Ce-WO}_3$ .

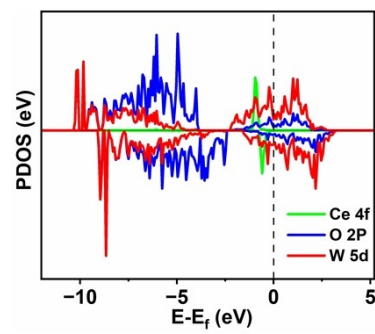

Fig. S32 PDOS of  $\text{Ce-WO}_3$ .

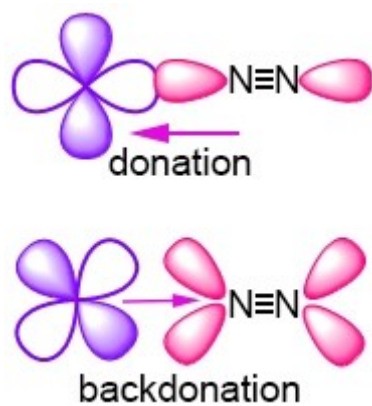

Fig. S33 Schematic of electron feedback mechanism from d orbitals of W to  $\pi^*$  of  $N_2$ .

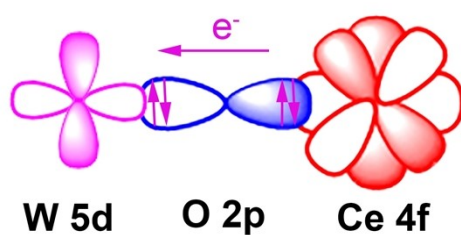

Fig. S34 The schematic diagram displaying Ce bonding to O and transition metal W species

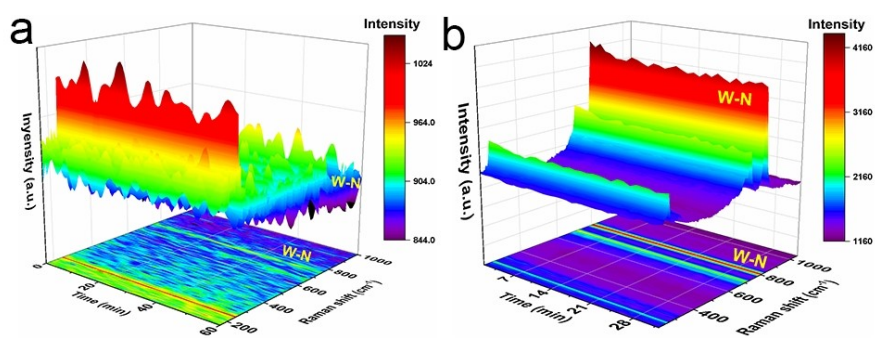

Fig. S35 In situ Raman spectra of (a)  $WO_3$  and (b)  $Ce-WO_3$ .

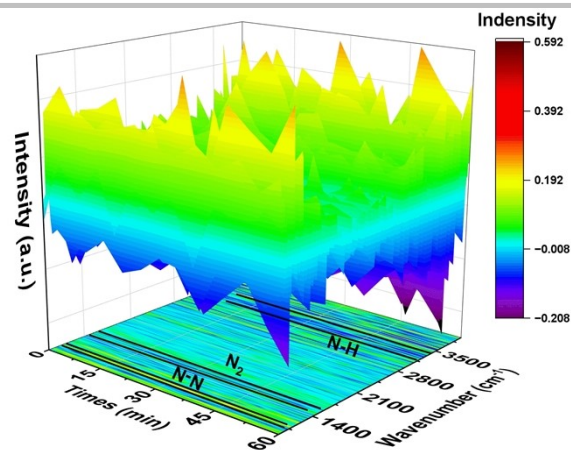

Fig. S36 In situ FTIR spectra of Ce-WO<sub>3</sub>.

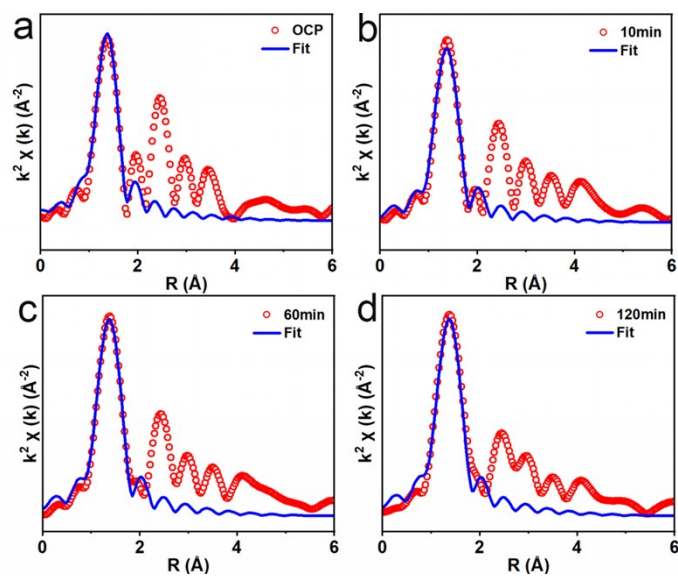

Fig. S37 EXAFS fitting spectrum for Ce-WO<sub>3</sub>.

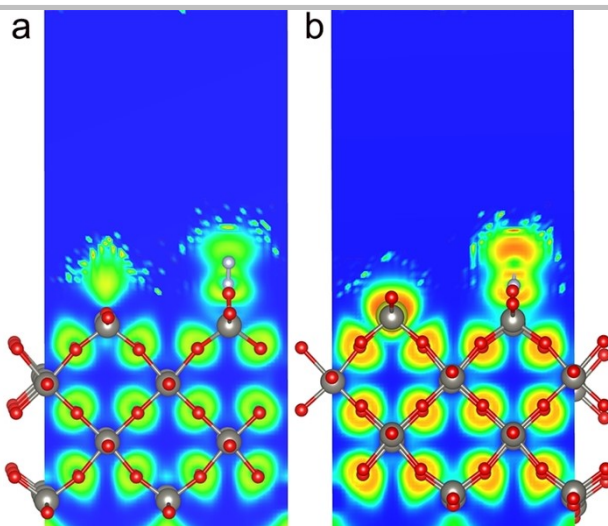

Fig. S38 The ELF of  $N_2$  on the (a)  $WO_3$  and (b)  $Ce-WO_3$ .

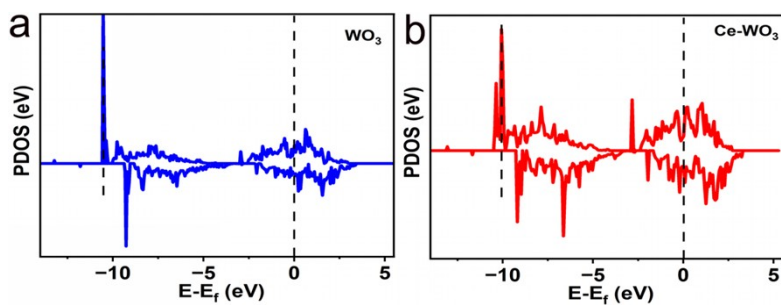

Fig. S39 DOS of the  $N_2$  on the (a)  $WO_3$  and (b)  $Ce-WO_3$ .

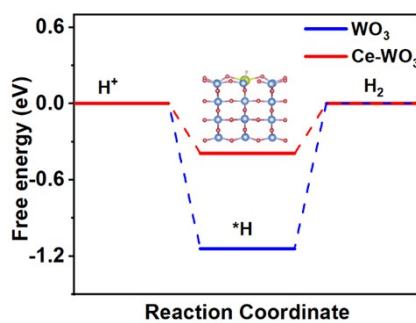

Fig. S40 Free-energy diagrams of HER on the  $WO_3$  and  $Ce-WO_3$ .

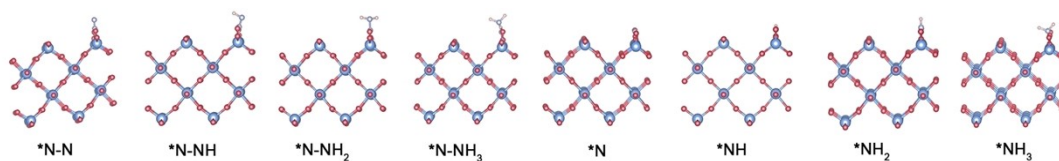

Fig. S41 The optimized structures of different intermediates for  $WO_3$  during NRR.

**Table S1.** Curve fit Parameters<sup>a</sup> for W K-edge EXAFS for WO<sub>3</sub> and Ce-WO<sub>3</sub> standard.

| sample             | Scattering pair | CN      | R(Å)      | $\sigma^2/\text{Å}^2$ | $\Delta E_0(\text{ev})$ | R factor |
|--------------------|-----------------|---------|-----------|-----------------------|-------------------------|----------|
| Ce-WO <sub>3</sub> | W-O             | 2.2±0.3 | 1.90±0.02 | 0.001±0.004           | 1.0±0.5                 | 0.028    |
| WO <sub>3</sub>    | W-O             | 3.0±0.3 | 1.72±0.03 | 0.003±0.005           | 1.0±0.5                 | 0.028    |

S02 is the amplitude reduction factor; CN is the coordination number; R is interatomic distance (the bond length between central atoms and surrounding coordination atoms);  $\sigma^2$  is Debye-Waller factor (a measure of thermal and static disorder in absorber-scatterer distances);  $\Delta E_0$  is edge-energy shift (the difference between the zero kinetic energy value of the sample and that of the theoretical model). R factor is used to value the goodness of the fitting.

Ce-WO<sub>3</sub>: (FT range: 3.0-10.0 Å<sup>-1</sup>; fitting range: 1-2 Å)

WO<sub>3</sub>: (FT range: 3.0-10.0 Å<sup>-1</sup>; fitting range: 1-2 Å)

**Table S2.** ICP-MS results of the Ce-WO<sub>3</sub> and WO<sub>3</sub> samples.

| Catalysts          | Content of Ce (wt.%) |
|--------------------|----------------------|
| Ce-WO <sub>3</sub> | 2.9634               |
| WO <sub>3</sub>    | 0                    |

**Table S3** Structural parameters extracted from the W L<sub>3</sub>-edge EXAFS fitting.

| sample (Ce-WO <sub>3</sub> ) | Scattering pair | CN        | R(Å)       | $\sigma^2/\text{Å}$ | $\Delta E_0(\text{ev})$ | R factor |
|------------------------------|-----------------|-----------|------------|---------------------|-------------------------|----------|
| OCP                          | W-O             | 2.41±0.01 | 1.785±0.01 | 0.001±0.001         | 1.0±0.5                 | 0.018    |
| 10min                        | W-O             | 2.42±0.01 | 1.792±0.01 | 0.001±0.001         | 1.0±0.5                 | 0.018    |
| 60min                        | W-O             | 2.62±0.01 | 1.797±0.01 | 0.002±0.001         | 1.0±0.5                 | 0.018    |
| 120min                       | W-O             | 2.90±0.01 | 1.802±0.01 | 0.003±0.001         | 1.0±0.5                 | 0.018    |

(S02=1)

S02 is the amplitude reduction factor; CN is the coordination number; R is interatomic distance (the bond length between central atoms and surrounding coordination atoms);  $\sigma^2$  is Debye-Waller factor (a measure of thermal and static disorder in absorber-scatterer distances);  $\Delta E_0$  is edge-energy shift (the difference between the zero kinetic energy value of the sample and that of the theoretical model). R factor is used to value the goodness of the fitting.

Ce-WO<sub>3</sub>: (FT range: 3.0-10.0 Å<sup>-1</sup>; fitting range: 1-2 Å)

**Table S4.** Comparison of electrocatalytic N<sub>2</sub> reduction performance with other reported electrocatalysts recently.

| Catalysts                                         | Electrolyte                           | Yield (NH <sub>3</sub> )                                 | FE (NH <sub>3</sub> ) | Ref.      |
|---------------------------------------------------|---------------------------------------|----------------------------------------------------------|-----------------------|-----------|
| Ce-WO <sub>3</sub>                                | 0.1 M Li <sub>2</sub> SO <sub>4</sub> | 47.11 μg h <sup>-1</sup> mg <sub>cat</sub> <sup>-1</sup> | 25.49%                | This work |
| Co <sub>0.05</sub> W <sub>0.95</sub> C            | 0.1 M H <sub>2</sub> SO <sub>4</sub>  | 32.49 μg h <sup>-1</sup> mg <sub>cat</sub> <sup>-1</sup> | 27.17%                | [1]       |
| WO <sub>3</sub> -C <sub>3</sub> N <sub>4</sub>    | 0.1 M Li <sub>2</sub> SO <sub>4</sub> | 54.87 μg h <sup>-1</sup> mg <sub>cat</sub> <sup>-1</sup> | 24.33 %               | [2]       |
| NV-W <sub>2</sub> N <sub>3</sub>                  | 0.1 M KOH                             | 11.66 μg h <sup>-1</sup> mg <sub>cat</sub> <sup>-1</sup> | 11.67%                | [3]       |
| W <sub>18</sub> O <sub>49</sub>                   | 0.25M LiClO <sub>4</sub>              | 24.7 μg h <sup>-1</sup> mg <sub>cat</sub> <sup>-1</sup>  | 20%                   | [4]       |
| WO <sub>3</sub> -C <sub>3</sub> N <sub>4</sub> -R | 0.1 M Li <sub>2</sub> SO <sub>4</sub> | 43.5 μg h <sup>-1</sup> mg <sub>cat</sub> <sup>-1</sup>  | 11.2%                 | [5]       |
| W-NO/NC                                           | 0.5 M LiClO <sub>4</sub>              | 12.62 μg h <sup>-1</sup> mg <sub>cat</sub> <sup>-1</sup> | 8.35%                 | [6]       |
| FeWS <sub>x</sub> @FeWO <sub>4</sub>              | 0.1 M KOH                             | 30.2 μg h <sup>-1</sup> mg <sub>cat</sub> <sup>-1</sup>  | 16.4%                 | [7]       |
| WS <sub>2</sub> -WO <sub>3</sub>                  | 0.1 M Li <sub>2</sub> SO <sub>4</sub> | 62.38 μg h <sup>-1</sup> mg <sub>cat</sub> <sup>-1</sup> | 24.24%                | [8]       |
| WS <sub>2</sub> @MoS <sub>2</sub>                 | 0.1 M KOH                             | 61.79 μg h <sup>-1</sup> mg <sub>cat</sub> <sup>-1</sup> | 21.64%                | [9]       |
| PdCu                                              | 0.1 M HCl                             | 20.24 μg h <sup>-1</sup> mg <sub>cat</sub> <sup>-1</sup> | 13.16%                | [10]      |

---

## References

1. Y. Gao, M.-J. Zhu, X.-H. Liu, G.-L. Dai, Y.-W. Zhou, Z.-D. Meng, L. Luo, T. Gan, F. Chen, Y.-Y. Zhou, W.-W. Deng and S.-Q. Liu, *Chem. Eng. J.*, 2024, **493**,152659.
2. X. Wang, J. Li, Y. Ji, S. Li, S. Wang, Y. Sun, X. Gao, Z. Tang, H. Zhang, F. Zhang, J. Xie, Z. Yang and Y.-M. Yan, *Appl. Catal. B Environ.*, 2024, **345**,123700.
3. H. Jin, L. Li, X. Liu, C. Tang, W. Xu, S. Chen, L. Song, Y. Zheng and S. Z. Qiao, *Adv. Mater.*, 2019, **31**,1902709.
4. Y. Tong, H. Guo, D. Liu, X. Yan, P. Su, J. Liang, S. Zhou, J. Liu, G. Q. Lu and S. X. Dou, *Angew. Chem. Int. Ed.*, 2020, **59**,7356-7361.
5. X. Wang, J. Xie, S. Li, Z. Yuan, Y. Sun, X. Gao, Z. Tang, H. Zhang, J. Li, S. Wang, Z. Yang and Y.-M. Yan, *Appl. Catal. B Environ.*, 2023, **339**,123126.
6. Y. Gu, B. Xi, W. Tian, H. Zhang, Q. Fu and S. Xiong, *Adv. Mater.*, 2021, **33**,2100429.
7. Y. Zhao, F. Li, W. Li, Y. Li, C. Liu, Z. Zhao, Y. Shan, Y. Ji and L. Sun, *Angew. Chem. Int. Ed.*, 2021, **60**,20331-20341.
8. X. Wang, S. Li, Z. Yuan, Y. Sun, Z. Tang, X. Gao, H. Zhang, J. Li, S. Wang, D. Yang, J. Xie, Z. Yang and Y. M. Yan, *Angew. Chem. Int. Ed.*, 2023, **62**,e202303794
9. B. Cui, M. Cao, J. Weng, Y. Li, C. Wang, J. Liu, Y. Wen, L. Tao and S. Liu, *ACS Appl. Mater. Interfaces*, 2025, **17**,38648-38657.
10. L. Wen, K. Sun, X. Liu, W. Yang, L. Li and H. L. Jiang, *Adv. Mater.*, 2023, **60**, 2210669.
